# Supplementary material for: Sex differences in the prevalence of obesity in 800,000 Chinese adults with type 2 diabetes
Source: PubMed Central journal article supplement — Endocr Connect. 2021 Feb 2;10(2):139–45. doi: 10.1530/EC-20-0547 (PMC7983479; doi:10.1530/ec-20-0547), 2021-02-02
Supplement: supplementary_figure_1.pdf [file supplementary_figure_1.pdf]

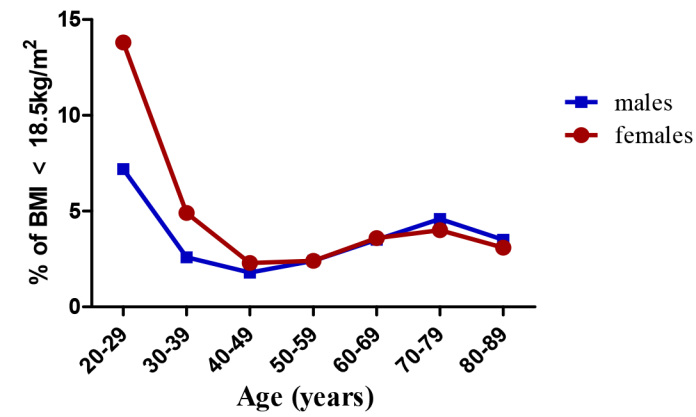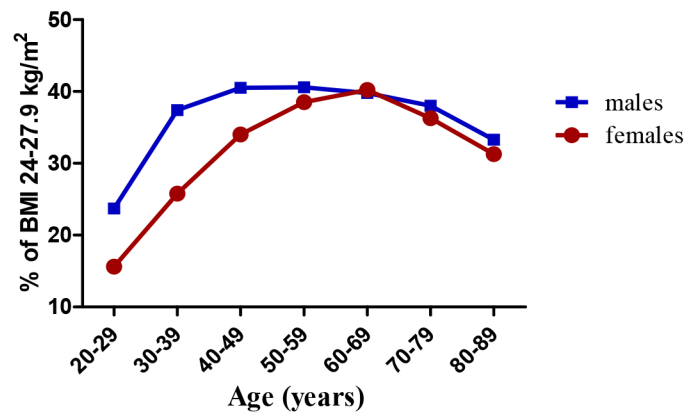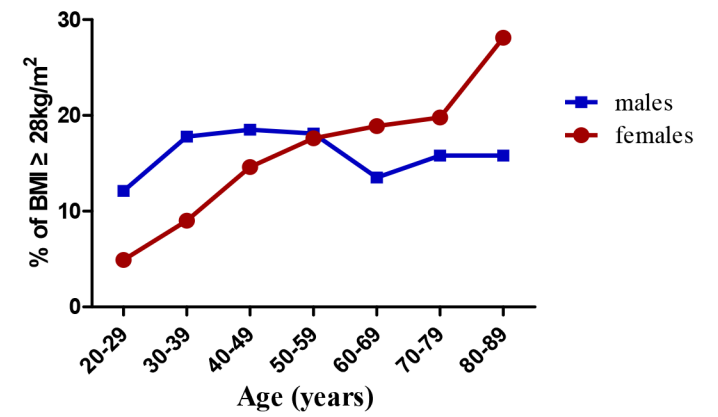

**Supplemental Figure 1-A**

**Supplemental Figure 1-B**

**Supplemental Figure 1-C**

**Supplemental Figure 1. Sex difference of trends in the prevalence of underweight, normal weight, overweight and obesity with age in general population in China.**

Supplemental Figure 1-A. Trends in the prevalence of underweight with age in male and female participants ( $p$  for trend < 0.01).

Supplemental Figure 1-B. Trends in the prevalence of overweight with age in male and female participants ( $p$  for trend < 0.01).

Supplemental Figure 1-C. Trends in the prevalence of obesity with age in male and female participants ( $p$  for trend < 0.01 in female).

According to the WGO criteria: underweight was defined as  $BMI < 18.5 \text{ kg/m}^2$ , overweight as  $24 \text{ kg/m}^2 \leq BMI < 28 \text{ kg/m}^2$  and obesity as  $BMI \geq 28 \text{ kg/m}^2$ .
