# Supplementary material for: Sex differences in the prevalence of obesity in 800,000 Chinese adults with type 2 diabetes
Source: PubMed Central journal article supplement — Endocr Connect. 2021 Feb 2;10(2):139–45. doi: 10.1530/EC-20-0547 (PMC7983479; doi:10.1530/ec-20-0547), 2021-02-02
Supplement: supplementary_figure_2.pdf [file supplementary_figure_2.pdf]

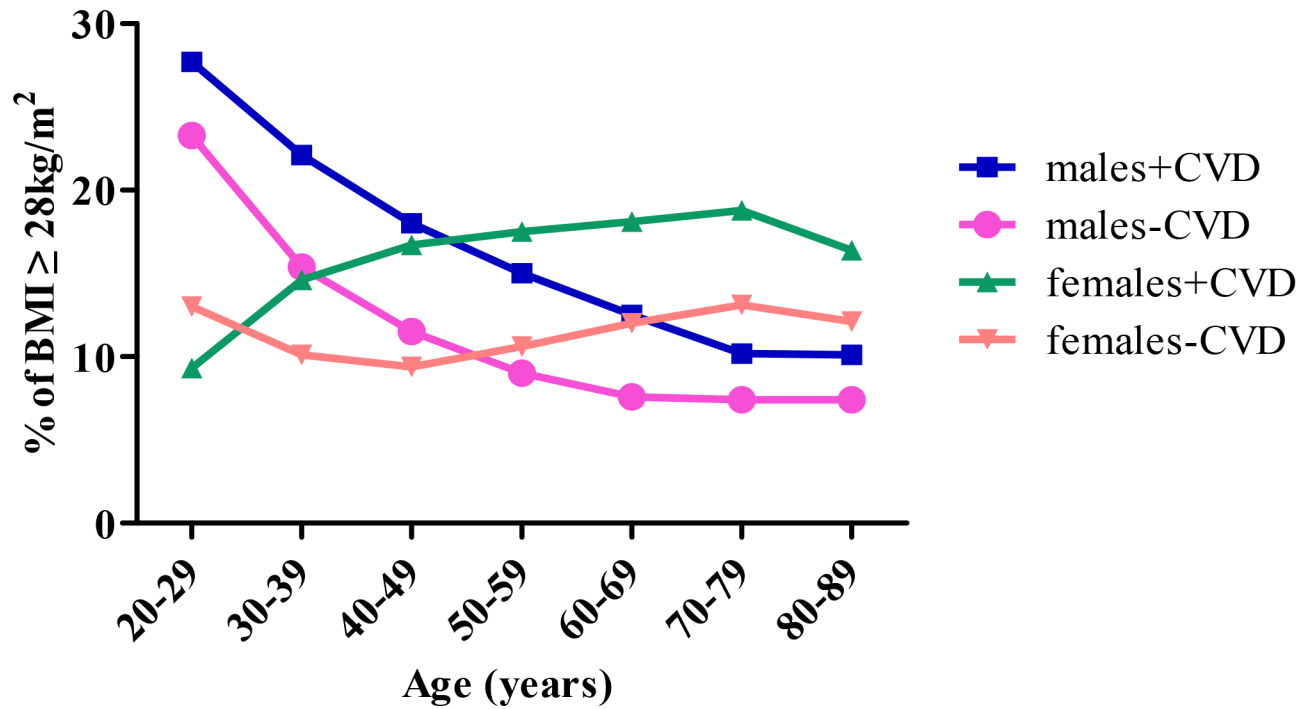

**Supplemental Figure 2. Trends in the prevalence of obesity with age in patients with T2D stratified by history of CVD and sex.**

*p* for trend 0.051 in females with CVD, *p* for trend < 0.01 for other groups

According to the WGOc criteria: obesity was defined as BMI  $\geq$  28 kg/m<sup>2</sup>.
