# Supplementary material for: Sex differences in the prevalence of obesity in 800,000 Chinese adults with type 2 diabetes
Source: PubMed Central journal article supplement — Endocr Connect. 2021 Feb 2;10(2):139–45. doi: 10.1530/EC-20-0547 (PMC7983479; doi:10.1530/ec-20-0547), 2021-02-02
Supplement: supplementary_figure_3.pdf [file supplementary_figure_3.pdf]

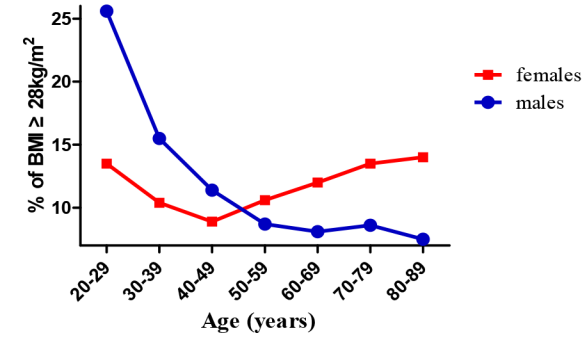

Supplemental Figure 3-A

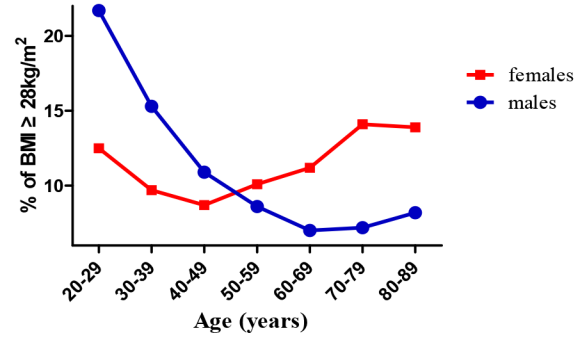

Supplemental Figure 3-B

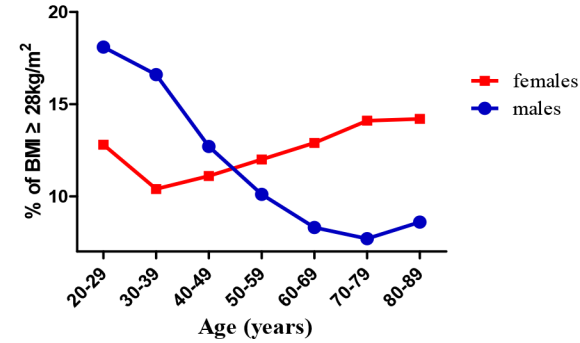

Supplemental Figure 3-C

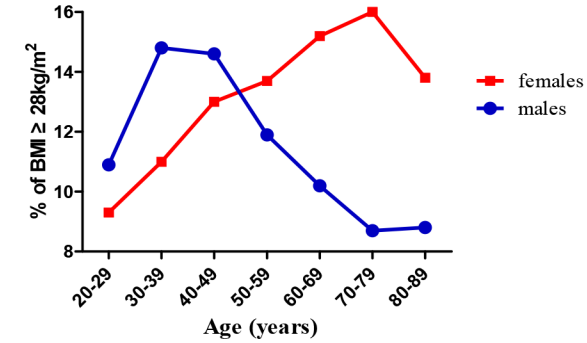

Supplemental Figure 3-D

**Supplemental Figure 3. Trends in the prevalence of obesity with age in patients with T2D stratified by duration of diabetes and sex.**

Supplemental Figure 3-A. Trends in the prevalence of obesity with age in first quartile of diabetes duration ( $p$  for trend < 0.01).

Supplemental Figure 3-B. Trends in the prevalence of obesity with age in second quartile of diabetes duration ( $p$  for trend < 0.01).

Supplemental Figure 3-C. Trends in the prevalence of obesity with age in third quartile of diabetes duration ( $p$  for trend < 0.01).

Supplemental Figure 3-D. Trends in the prevalence of obesity with age in fourth quartile of diabetes duration ( $p$  for trend < 0.01).

According to the WGOC criteria: obesity was defined as BMI  $\geq$  28 kg/m<sup>2</sup>.
