# Supplementary material for: Sex differences in the prevalence of obesity in 800,000 Chinese adults with type 2 diabetes
Source: PubMed Central journal article supplement — Endocr Connect. 2021 Feb 2;10(2):139–45. doi: 10.1530/EC-20-0547 (PMC7983479; doi:10.1530/ec-20-0547), 2021-02-02
Supplement: supplementary_table_2.pdf [file supplementary_table_2.pdf]

**Supplemental Table 2. Demographic and clinical characteristics of the participants in this pooled analysis with type 2 diabetes.**

| <b>Demographic</b>                  | <b>Total</b>   | <b>2009 CNHSS</b> | <b>2010 CNHSS</b> | <b>2010-2011<br/>CCMR-3B</b> | <b>2011 CNHSS</b> | <b>2012 CNHSS</b> | <b>2016-2017 China<br/>Dia-LEAD</b> |
|-------------------------------------|----------------|-------------------|-------------------|------------------------------|-------------------|-------------------|-------------------------------------|
| <b>Number of participants, n</b>    | 811264         | 142741            | 172164            | 25342                        | 238066            | 222885            | 10066                               |
| <b>Male sex, n (%)</b>              | 424810 (52.4%) | 73340 (51.4%)     | 90051 (52.3%)     | 11901 (47.0%)                | 124203 (52.2%)    | 119929 (53.8%)    | 5386 (53.5%)                        |
| <b>Age (years)</b>                  | 58.9±11.5      | 59.4±11.9         | 58.9±11.3         | 62.5±11.8                    | 58.7±11.6         | 58.3±11.3         | 64.0±8.0                            |
| <b>BMI (kg/m<sup>2</sup>)</b>       | 24.4±3.1       | 24.5±3.2          | 24.3±3.1          | 24.8±3.6                     | 24.4±3.1          | 24.5±3.0          | 24.8±3.6                            |
| <18.5 kg/m <sup>2</sup> , n (%)     | 16017 (2.0%)   | 3254 (2.3%)       | 4002 (2.3%)       | 596 (2.4%)                   | 4145 (1.7%)       | 3805 (1.7%)       | 215 (2.1%)                          |
| 18.5-23.9 kg/m <sup>2</sup> , n (%) | 352833 (43.5%) | 61704 (43.2%)     | 76910 (44.7%)     | 9942 (39.2%)                 | 105625 (44.4%)    | 94631 (42.5%)     | 4021 (39.9%)                        |
| 24-27.9 kg/m <sup>2</sup> , n (%)   | 353088 (43.5%) | 60619 (42.5%)     | 73455 (42.7%)     | 10649 (42.0%)                | 103499 (43.5%)    | 100631 (45.1%)    | 4235 (42.1%)                        |
| ≥28 kg/m <sup>2</sup> , n (%)       | 89326 (11.0%)  | 17164 (12.0%)     | 17797 (10.3%)     | 4155 (16.4%)                 | 24797 (10.4%)     | 23818 (10.7%)     | 1595 (15.8%)                        |
| <b>Duration of diabetes (years)</b> | 5.7±5.3        | 6.2±5.8           | 5.1±4.7           | 8.0±6.7                      | 5.5±5.3           | 5.4±5.0           | 10.0±7.3                            |
| 0 to <1 years, n (%)                | 127325 (15.7%) | 22965 (16.1%)     | 28339 (16.5%)     | 2250 (8.9%)                  | 36229 (15.2%)     | 37539 (16.8%)     | 3 (0%)                              |

|                                   |                |               |               |              |                |               |              |
|-----------------------------------|----------------|---------------|---------------|--------------|----------------|---------------|--------------|
| 1 to <5 years, n (%)              | 328716 (40.5%) | 49880 (34.9%) | 71960 (41.8%) | 8382 (33.1%) | 102366 (43.0%) | 93604 (42.0%) | 2524 (25.1%) |
| 5 to <10 years, n (%)             | 201692 (24.9%) | 39651 (27.8%) | 46608 (27.1%) | 6073 (24.0%) | 55623 (23.4%)  | 51145 (22.9%) | 2592 (25.8%) |
| 10 to <20 years, n (%)            | 131353 (16.2%) | 24849 (17.4%) | 22194 (12.9%) | 6768 (26.7%) | 37732 (15.8%)  | 36270 (16.3%) | 3540 (35.2%) |
| ≥20 years, n (%)                  | 22143 (2.7%)   | 5396 (3.8%)   | 3063 (1.8%)   | 1834 (7.2%)  | 6116 (2.6%)    | 4327 (1.9%)   | 1407 (14.0%) |
| <b>Glycated hemoglobin (%)</b>    | 7.85±1.77      | 7.97±2.00     | 7.89±1.79     | 7.62±2.03    | 7.85±1.72      | 7.74±1.57     | 8.43±2.11    |
| <b>SBP (mmHg)</b>                 | 131±15         | 132±16        | 131±15        | 133±16       | 132±15         | 132±15        | 136±19       |
| <b>DBP (mmHg)</b>                 | 82±11          | 80±10         | 87±10         | 79±9         | 81±11          | 81±10         | 79±11        |
| <b>Total cholesterol (mmol/l)</b> | 4.77±1.44      | 4.81±1.31     | 4.85±1.33     | 4.98±1.45    | 4.74±1.47      | 4.71±1.56     | 4.63±1.33    |
| <b>Triglycerides (mmol/l)</b>     | 2.19±1.60      | 2.14±1.53     | 2.15±1.54     | 1.97±1.67    | 2.16±1.56      | 2.30±1.69     | 1.94±2.22    |
| <b>HDL-C (mmol/l)</b>             | 2.89±1.23      | 1.68±1.14     | 1.40±0.61     | 1.31±0.53    | NA             | NA            | 1.18±0.61    |
| <b>LDL-C (mmol/l)</b>             | 1.43±0.73      | 2.79±1.03     | 2.76±0.98     | 2.82±0.92    | 2.92±1.16      | 3.03±1.57     | 2.73±1.03    |

CNHSS: China National HbA1c Surveillance System; CCMR-3B: China Cardiometabolic Registries 3B study; SBP: systolic blood pressure; DBP: diastolic blood pressure.
